# Supplementary material for: Phospho-AXL is widely expressed in glioblastoma and associated with significant shorter overall survival
Source: PubMed Central journal article supplement (PMC5584143; doi:10.18632/oncotarget.18468), 2017-06-13
Supplement: oncotarget-08-50403-s001.pdf [file oncotarget-08-50403-s001.pdf]

## Phospho-AXL is widely expressed in glioblastoma and associated with significant shorter overall survival

### Supplementary Material

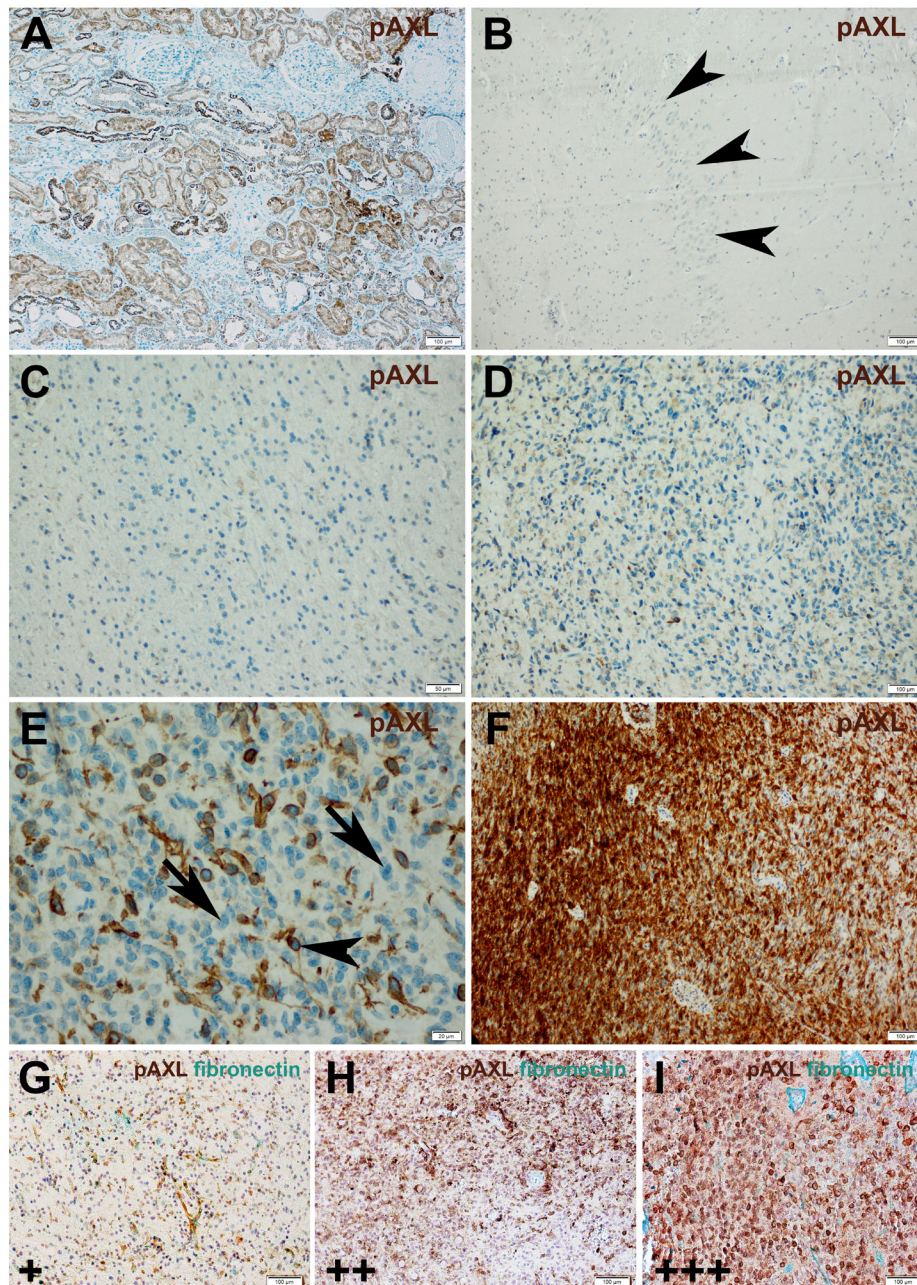

**Supplementary Figure 1:** To confirm the specificity of P-AXL staining in formalin-fixed, paraffin-embedded (FFPE) tissue sections, human kidney served as positive control (A). Normal brain tissue was used as negative control (B; arrowheads: dentate gyrus). C and D illustrate two GBM cases with weak background staining that were considered immunonegative (0) for P-AXL.. Focal P-AXL expression was detected in E with clearly positive (arrowhead) and negative (arrows) tumor cells. F: Example of a GBM case with global P-AXL expression. Positive staining intensity of P-AXL was graded semiquantitatively as 1+ (weak, G), 2+ (moderate, H), and 3+ (strong, I). (Scale bar: 100  $\mu$ m (A, B, D, F, G-I); 50  $\mu$ m (C); 20  $\mu$ m (E))
